# Supplementary material for: Controllable nitrogen-doping of nanoporous carbons enabled by coordination frameworks
Source: Royal Society of Chemistry journal article supplement (doi:10.1039/c8ta09817d), 2018-12-13
Supplement: c8ta09817d1.pdf [file c8ta09817d1.pdf]

## Supporting Information

### Controllable Nitrogen-Doping of Nanoporous Carbons Enabled by Coordination Frameworks

Wei Zhang<sup>a‡</sup>, Saiyu Bu<sup>a‡</sup>, Qinghong Yuan<sup>a\*</sup>, Qiang Xu<sup>b</sup>, Ming Hu<sup>a\*</sup>

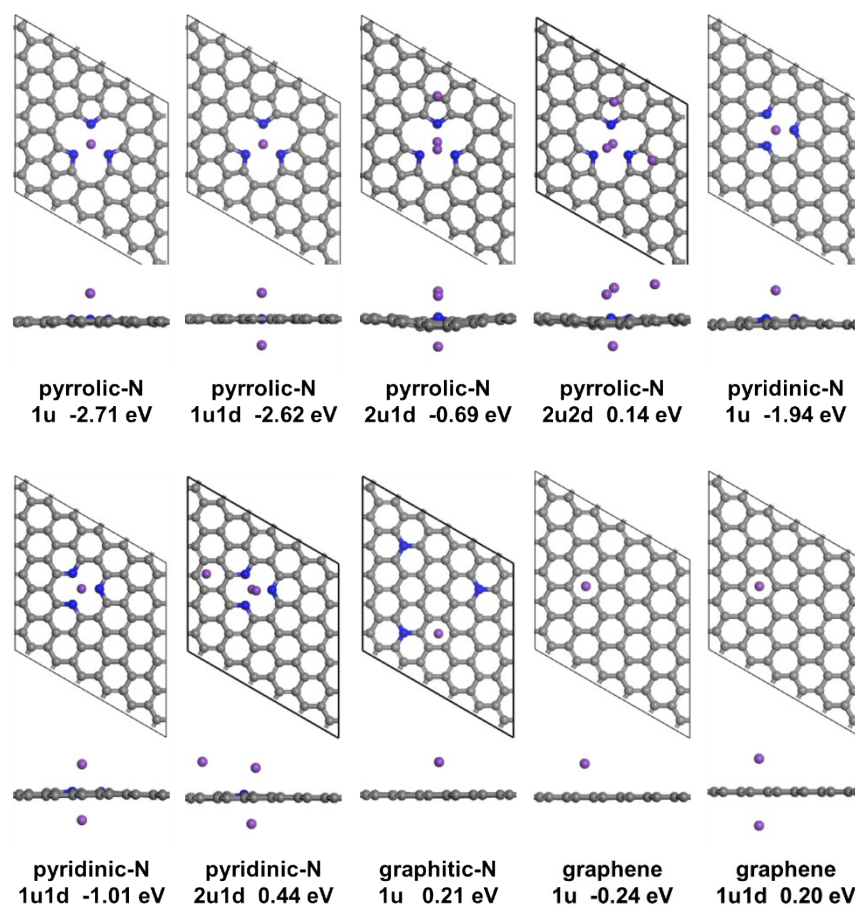

**Figure S1.** Illustration of pyrrolic-N, pyridinic-N and graphitic-N structures adsorbed by different K atoms. u means that K atoms are adsorbed above the structure, d means that K atoms are adsorbed below the structure. We defined the differential binding energy as  $E_{bind}^{diff} = E_{nK/sub} - E_{(n-1)K/sub} - E_K$ .<sup>1</sup> Where, n is the number of K atoms,  $E_{nK/sub}$  is the total energy of the N-doped carbon structure with adsorbed n K atoms,  $E_{(n-1)K/sub}$  is the total energy of the N-doped carbon structure with adsorbed n-1 K atoms, and  $E_K$  is the energy of a K atom in the bulk K.

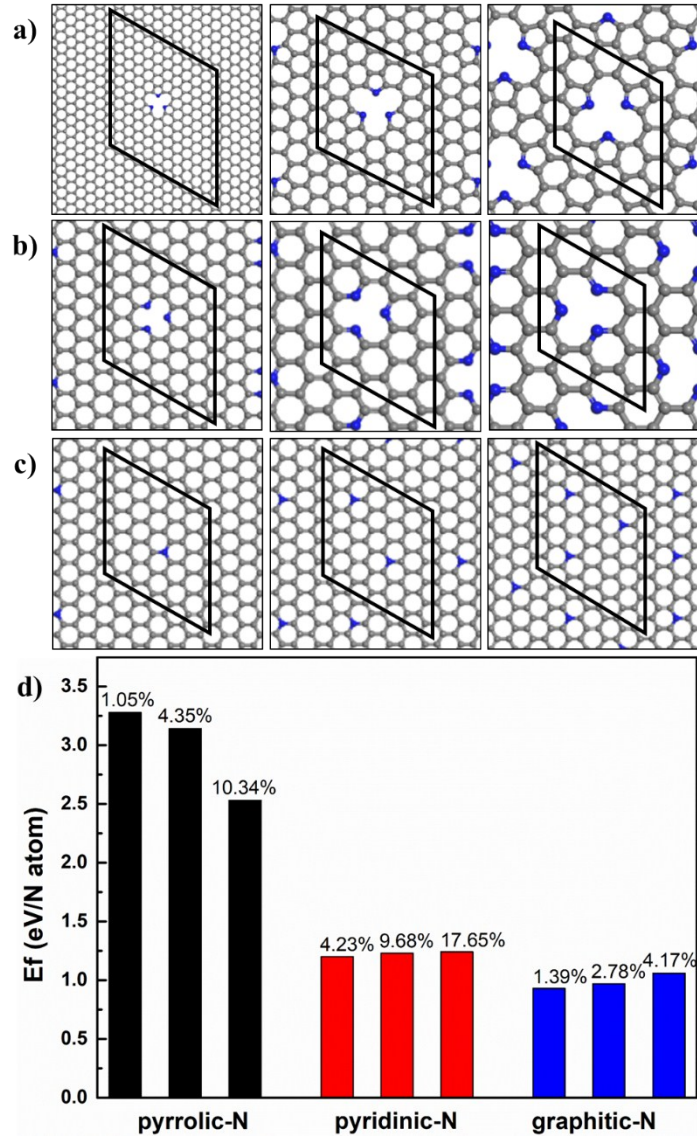

**Figure S2.** Illustration of pyrrolic-N, pyridinic-N and graphitic-N structures at different N concentrations. (atomic ratio) (a) pyrrolic-N: 1.05%, 4.35% and 10.34%; (b) pyridinic-N: 4.23%, 9.68% and 17.65%; (c) graphitic-N: 1.39%, 2.78% and 4.17%; (d) Formation energies of different N doping structures.

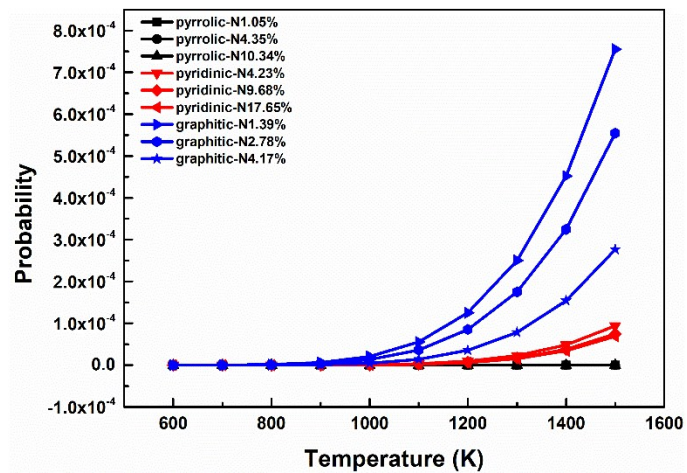

**Figure S3.** The population probability of pyrrolic-N, pyridinic-N and graphitic-N with different nitrogen concentration versus to the increase of temperature.

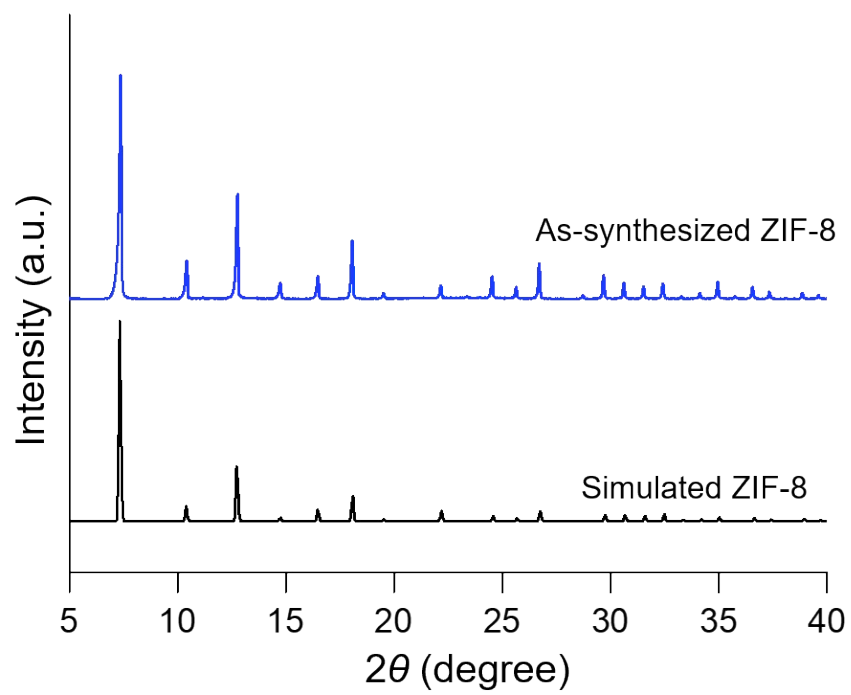

**Figure S4.** PXRD pattern of the as-synthesized ZIF-8 particles.

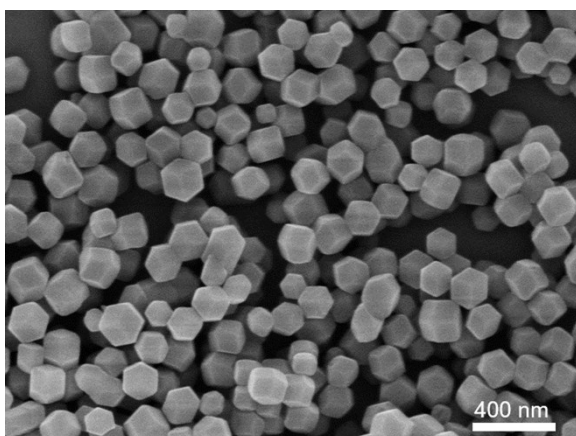

**Figure S5.** SEM image of the as-synthesized ZIF-8 particles.

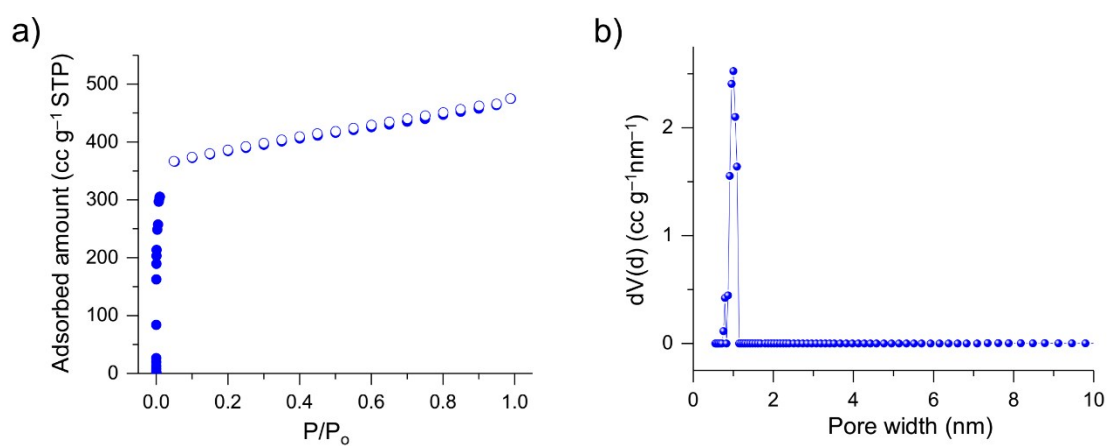

**Figure S6.** (a) N<sub>2</sub> adsorption-desorption isotherms and (b) the pore size distribution of ZIF-8 precursor.

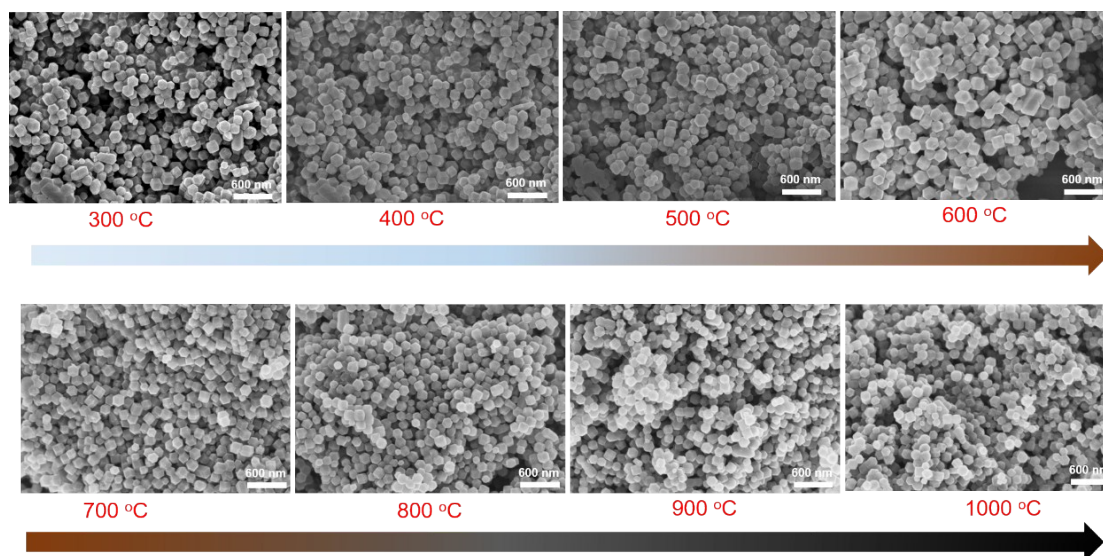

**Figure S7.** SEM images of the samples obtained by annealing the ZIF-8 particles at various temperatures.

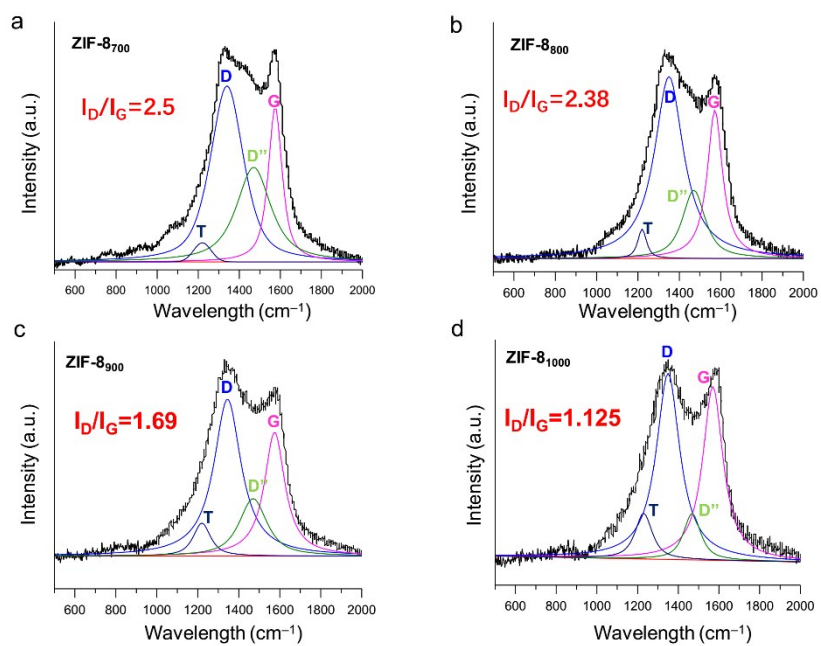

**Figure S8.** Raman spectra of (a) ZIF-8<sub>700</sub>, (b) ZIF-8<sub>800</sub>, (c) ZIF-8<sub>900</sub> and (d) ZIF-8<sub>1000</sub>.

The spectra were fitted based on the literature.<sup>2</sup>



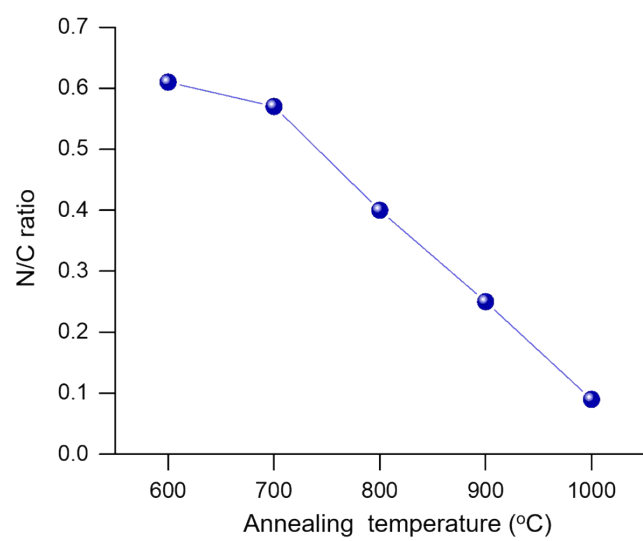

**Figure S9.** The N/C ratios of all the nanoporous carbons obtained at annealing temperature of 600 to 1000 °C.

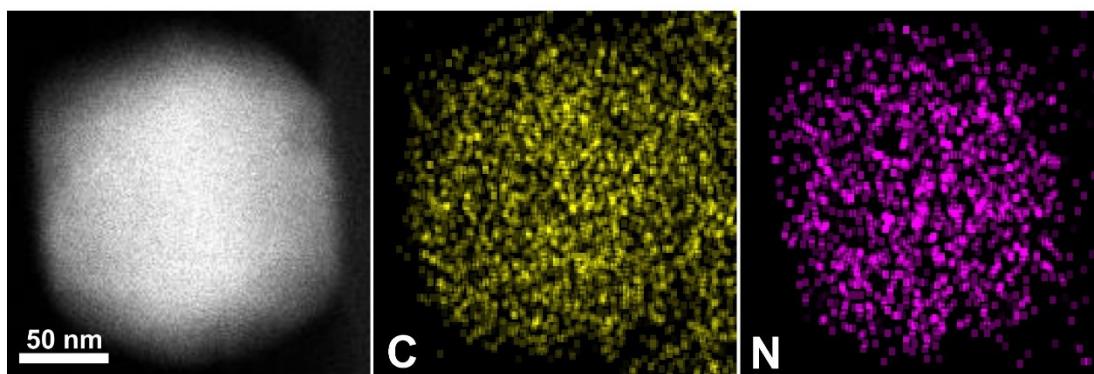

**Figure S10.** Elemental mapping of the carbonized sample (ZIF-8<sub>800</sub>).

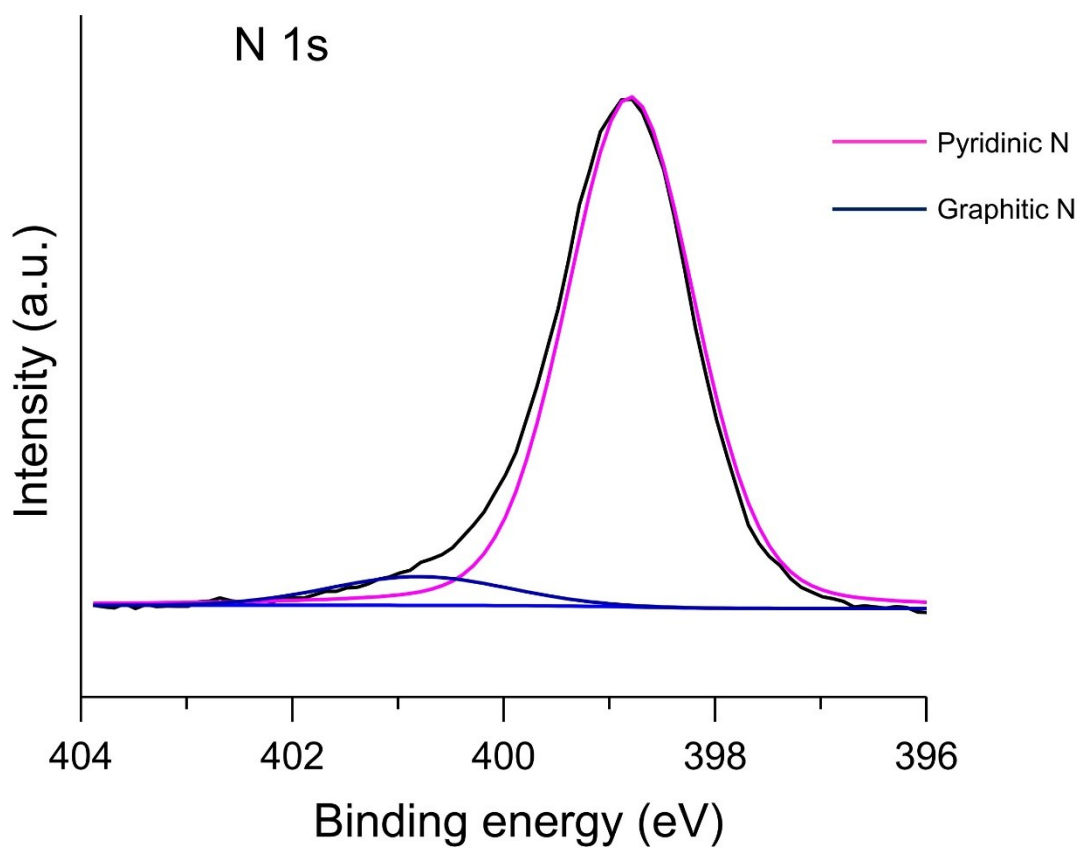

**Figure S11.** N1s spectra of the sample obtained by annealing the ZIF-8 particles at 700 °C for 12 h.

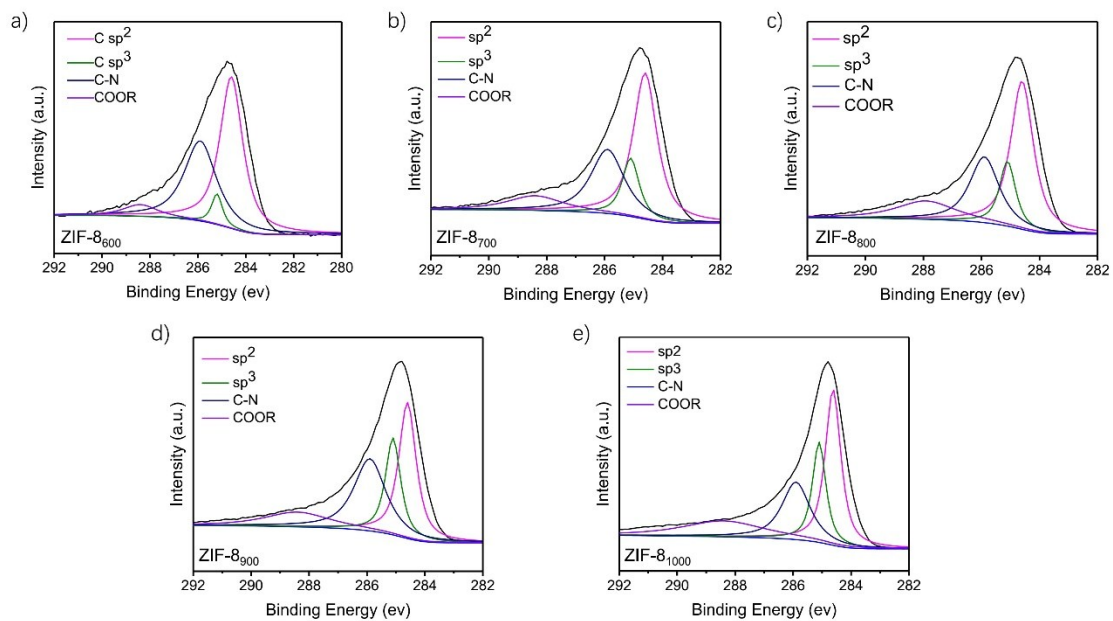

**Figure S12.** C1s spectra of the samples obtained by annealing the ZIF-8 particles at various temperatures.

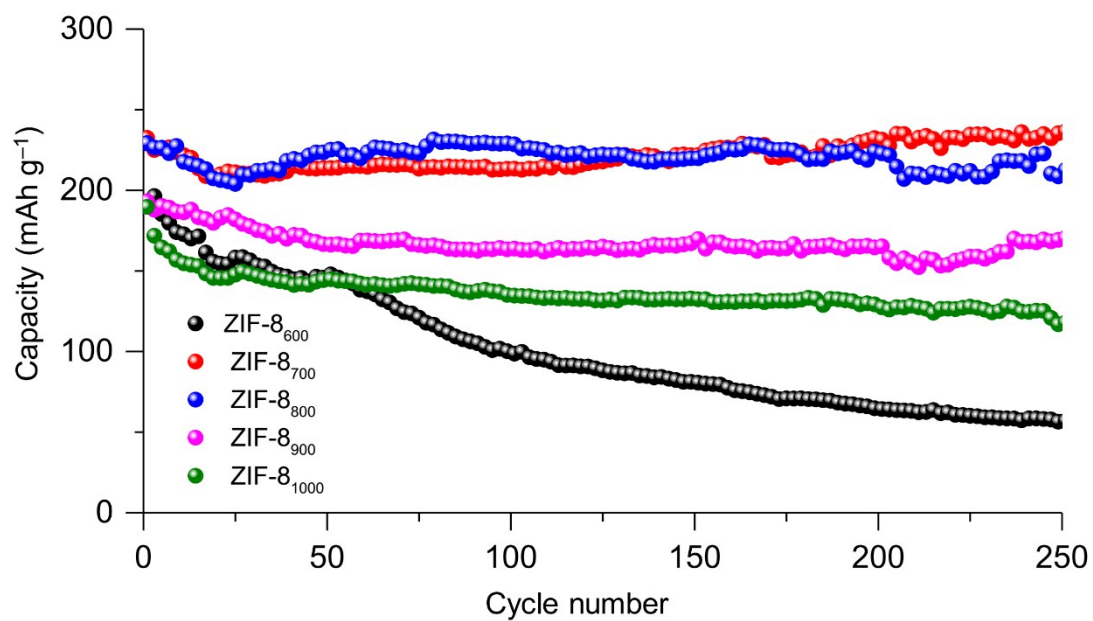

**Figure S13.** Cycling performance of ZIF-8 carbonized under temperatures ranging from 600 °C to 1000 °C with a current of 30 mA g<sup>-1</sup>.

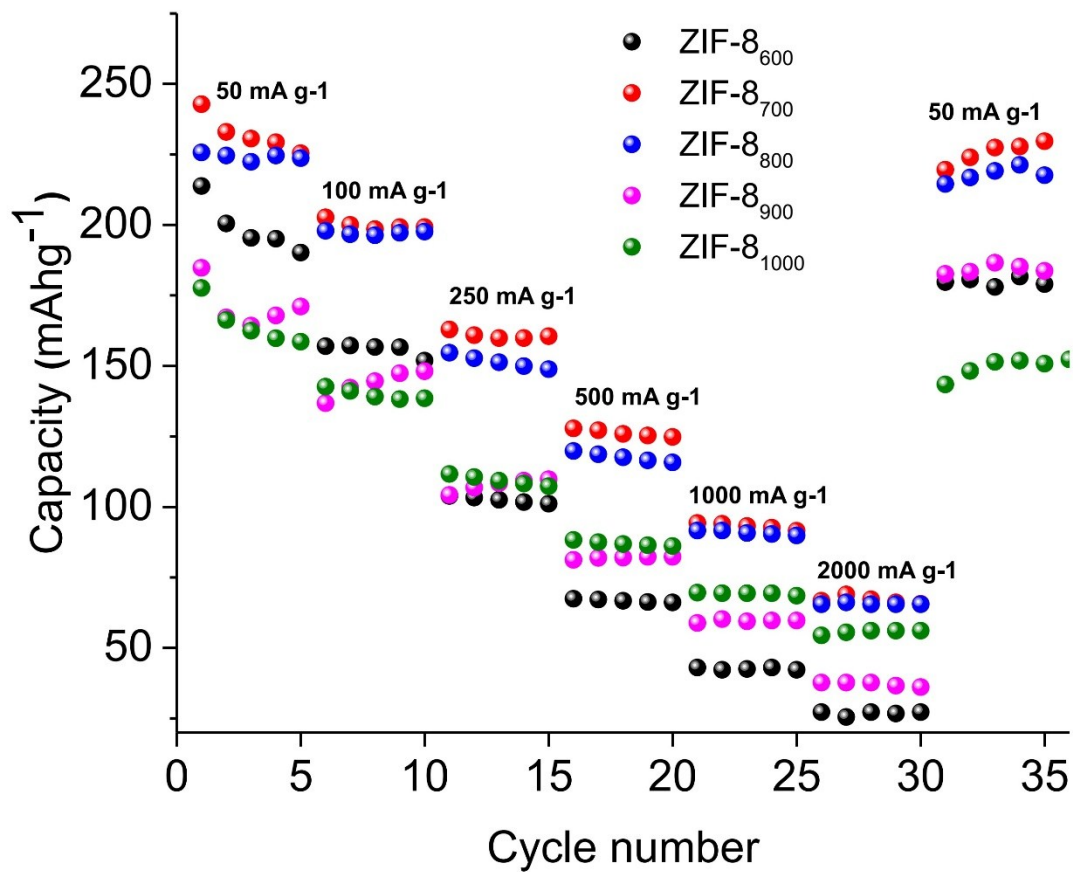

**Figure S14.** Rate performance of the ZIF-8 carbonized under various temperatures ranging from 600 °C to 1000 °C with various current density from 50 to 2000 mA g<sup>-1</sup>.

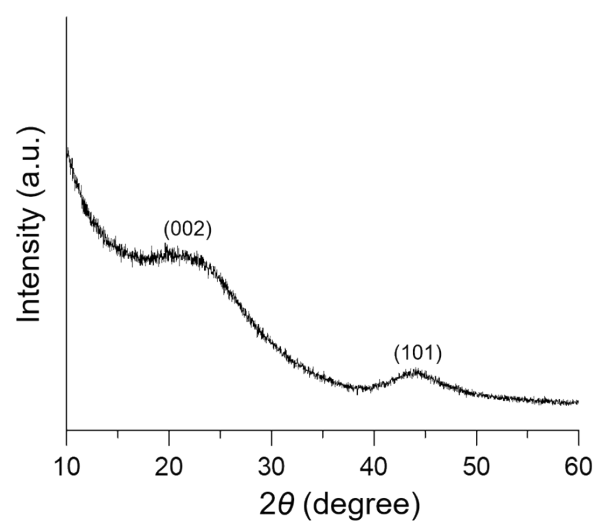

**Figure S15.** PXRD pattern of the hard carbon.

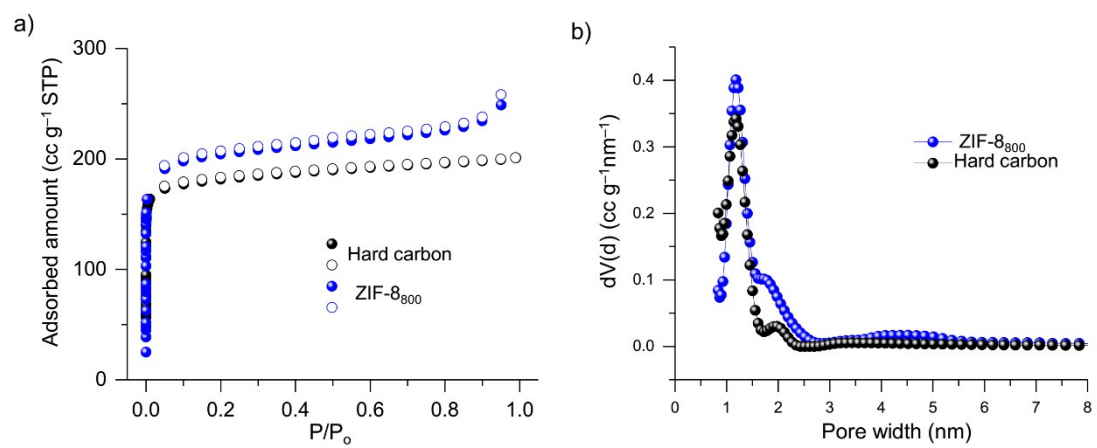

**Figure S16.** (a)  $N_2$  adsorption-desorption isotherms and (b) the pore size distribution of ZIF-8<sub>800</sub> and hard carbon.



**Table S1.** Comparison of cycling performance of various carbon-based anodes.

| Materials                    | Capacity Retention (mAh g <sup>-1</sup> ) | Remaining capacity (cycles) | Current Density (mA g <sup>-1</sup> ) | References |
|------------------------------|-------------------------------------------|-----------------------------|---------------------------------------|------------|
| ZIF-8 <sub>800</sub>         | 220                                       | 100% (100)                  | 100                                   | This work  |
| Graphite                     | 97                                        | 51% (50)                    | 139                                   | Ref. S3    |
| Soft carbon                  | 162                                       | 81% (50)                    | 558                                   | Ref. S3    |
| Hard carbon                  | 216                                       | 83% (100)                   | 28                                    | Ref. S4    |
| N-graphene                   | 210                                       | 78% (100)                   | 100                                   | Ref. S5    |
| Polynanocrystalline Graphite | 75                                        | 50 % (300)                  | 100                                   | Ref. S6    |
| HCNT                         | 232                                       | 100% (50)                   | 100                                   | Ref. S7    |
| Mesoporous Carbon            | 198                                       | 90% (200)                   | 200                                   | Ref. S8    |
| HCS-SC                       | 186                                       | 90% (200)                   | 279                                   | Ref. S9    |

## REFERENCES

1. H. Yildirim, A. Kinaci, Z.-J. Zhao, M. K. Y. Chan and J. P. Greeley, *ACS Appl. Mater. Inter.* 2014, **6**, 21141-21150.
2. S. Yamauchi and Y. Kurimoto, *J. Wood Sci.* 2003, **49**, 235-240.
3. Z. Jian, W. Luo and X. Ji, *J. Am. Chem. Soc.* 2015, **137**, 11566-11569.
4. Z. Jian, Z. Xing, C. Bommier, Z. Li and X. Ji, *Adv. Energy Mater.* 2016, **6**, 1501874.
5. K. Share, A. P. Cohn, R. Carter, B. Rogers and C. L. Pint, *ACS Nano* 2016, **10**, 9738-9744.
6. Z. Xing, Y. Qi, Z. Jian and X. Ji, *ACS Appl. Mater. Inter.* 2017, **9**, 4343-4351.
7. Y. Wang, Z. Wang, Y. Chen, H. Zhang, M. Yousaf, H. Wu, M. Zou, A. Cao and R. P. S. Han, *Adv. Mater.* 2018, **30**, 1802074.
8. W. Wang, J. Zhou, Z. Wang, L. Zhao, P. Li, Y. Yang, C. Yang, H. Huang and S. Guo, *Adv. Energy Mater.* 2018, **8**, 1701648.
9. Z. Jian, S. Hwang, Z. Li, A. S. Hernandez, X. Wang, Z. Xing, D. Su and X. Ji, *Adv. Funct. Mater.* 2017, **27**, 1700324.
